# Supplementary material
Source: PubMed Central journal article supplement (PMC5637621)
Supplement: tpmd170268.SD1.pdf [file tpmd170268.SD1.pdf]

SUPPLEMENTAL TABLE 1  
 PCR results for retrospective testing of stored patient samples from suspected Zika virus patients

| Patient ID | Gender | Delay of onset | Specimen type | RealStar Zika Virus RT-PCR (C <sub>t</sub> FAM) | Lancotti E PCR (C <sub>t</sub> FAM) |
|------------|--------|----------------|---------------|-------------------------------------------------|-------------------------------------|
| 1          | F      | 2              | Serum         | -                                               | -                                   |
| 1          | F      | 2              | Urine         | -                                               | -                                   |
| 2          | F      | 5              | Urine         | -                                               | -                                   |
| 3          | F      | 1              | Serum         | -                                               | -                                   |
| 3          | F      | 1              | Urine         | -                                               | -                                   |
| 4          | F      | 1              | Serum         | -                                               | -                                   |
| 4          | F      | 1              | Urine         | -                                               | -                                   |
| 5          | F      | 1              | Serum         | -                                               | -                                   |
| 5          | F      | 1              | Urine         | -                                               | -                                   |
| 6          | F      | 3              | Serum         | -                                               | -                                   |
| 6          | F      | 3              | Urine         | -                                               | -                                   |
| 7          | M      | 4              | Serum         | -                                               | -                                   |
| 7          | M      | 4              | Urine         | -                                               | -                                   |
| 8          | M      | 0              | Serum         | -                                               | -                                   |
| 8          | M      | 0              | Urine         | -                                               | -                                   |
| 9          | F      | 6              | Urine         | -                                               | -                                   |
| 10         | F      | 4              | Serum         | -                                               | -                                   |
| 10         | F      | 4              | Urine         | -                                               | -                                   |
| 11         | F      | 0              | Serum         | -                                               | -                                   |
| 11         | F      | 0              | Urine         | -                                               | -                                   |
| 12         | M      | 3              | Serum         | -                                               | -                                   |
| 12         | M      | 3              | Urine         | -                                               | -                                   |
| 13         | F      | 4              | Urine         | 33.03                                           | 33.85                               |
| 14         | F      | 2              | Serum         | 33.53                                           | 32.73                               |
| 15         | M      | 5              | Serum         | -                                               | -                                   |
| 15         | M      | 5              | Urine         | 33.76                                           | 34.83                               |
| 16         | M      | 2              | Serum         | -                                               | -                                   |
| 16         | M      | 2              | Urine         | -                                               | -                                   |
| 17         | F      | 3              | Serum         | 30.12                                           | 29.68                               |
| 18         | F      | 3              | Urine         | -                                               | -                                   |
| 19         | F      | 2              | Serum         | -                                               | -                                   |
| 19         | F      | 2              | Urine         | 33.41                                           | 33.95                               |
| 20         | F      | 6              | Urine         | -/-/36.99                                       | 38.64/-                             |
| 21         | M      | 2              | Serum         | -                                               | -                                   |
| 21         | M      | 2              | Urine         | -                                               | -                                   |
| 22         | M      | 1              | Serum         | -                                               | -                                   |
| 22         | M      | 1              | Urine         | -                                               | -                                   |
| 23         | F      | 2              | Serum         | -                                               | -                                   |
| 24         | F      | 7              | Urine         | -                                               | -                                   |
| 25         | F      | 0              | Serum         | 33.35                                           | 33.33                               |
| 25         | F      | 3              | Urine         | 31.93                                           | 32.81                               |
| 26         | F      | 3              | Serum         | -                                               | -                                   |
| 26         | F      | 3              | Urine         | -                                               | -                                   |
| 27         | F      | 0              | Urine         | -                                               | -                                   |
| 28         | M      | 5              | Serum         | -                                               | -                                   |
| 28         | M      | 5              | Urine         | -                                               | -                                   |
| 29         | F      | 7              | Urine         | -                                               | -                                   |
| 30         | M      | 1              | Serum         | -                                               | -                                   |
| 30         | M      | 1              | Urine         | -                                               | -                                   |
| 31         | F      | 1              | Serum         | 35.91                                           | 37.41                               |
| 31         | F      | 1              | Urine         | 30.14                                           | 30.05                               |
| 32         | M      | 2              | Serum         | -                                               | -                                   |
| 32         | M      | 2              | Urine         | -                                               | -                                   |
| 33         | F      | 2              | Serum         | 32.15                                           | 31.84                               |
| 34         | F      | 0              | Urine         | 35.43                                           | 36.43                               |
| 35         | M      | 7              | Urine         | 34.39                                           | 35.78                               |
| 36         | F      | 2              | Serum         | -/37.77/37.15                                   | 37.85/38.21                         |
| 37         | F      | 2              | Urine         | -                                               | -                                   |
| 38         | M      | 8              | Urine         | -                                               | -                                   |
| 39         | F      | 6              | Serum         | 30.94                                           | 30.34                               |
| 40         | M      | 3              | Serum         | -                                               | -                                   |
| 40         | M      | 3              | Urine         | -                                               | -                                   |
| 41         | M      | 3              | Serum         | -                                               | -                                   |
| 41         | M      | 3              | Urine         | -                                               | -                                   |
| 42         | F      | 0              | Serum         | 30.42                                           | 29.72                               |
| 43         | M      | 6              | Urine         | -                                               | -                                   |
| 44         | F      | 1              | Serum         | 35.92                                           | 36.27                               |
| 44         | F      | 1              | Urine         | 35.16                                           | 38.48                               |

(continued)

SUPPLEMENTAL TABLE 1

Continued

| Patient ID | Gender | Delay of onset | Specimen type | RealStar Zika Virus RT-PCR (C <sub>i</sub> FAM) | Lancotti E PCR (C <sub>i</sub> FAM) |
|------------|--------|----------------|---------------|-------------------------------------------------|-------------------------------------|
| 45         | M      | 6              | Urine         | -                                               | -                                   |
| 46         | M      | 4              | Serum         | -                                               | -                                   |
| 46         | M      | 4              | Urine         | -                                               | -                                   |
| 47         | M      | 3              | Urine         | 34.23                                           | 36.5                                |
| 48         | M      | 2              | Urine         | 26.17                                           | 25.65                               |
| 49         | M      | 4              | Serum         | -                                               | -                                   |
| 49         | M      | 4              | Urine         | -                                               | -                                   |
| 50         | F      | 6              | Urine         | -                                               | -                                   |
| 51         | F      | 2              | Serum         | 35.04                                           | 34.74                               |
| 52         | F      | 3              | Serum         | 33.48                                           | 33.18                               |
| 53         | M      | 5              | Serum         | -                                               | -                                   |
| 53         | M      | 5              | Urine         | -                                               | -                                   |
| 54         | F      | 1              | Serum         | 26.08                                           | 25.24                               |
| 55         | F      | 2              | Urine         | -                                               | -                                   |
| 56         | F      | 6              | Serum         | -                                               | -                                   |
| 56         | F      | 6              | Urine         | -                                               | -                                   |
| 57         | F      | 7              | Urine         | -                                               | -                                   |
| 58         | F      | 4              | Serum         | -                                               | -                                   |
| 58         | F      | 4              | Urine         | -                                               | -                                   |
| 59         | M      | 1              | Serum         | -                                               | -                                   |
| 59         | M      | 1              | Urine         | -                                               | -                                   |
| 60         | M      | 0              | Serum         | -                                               | -                                   |
| 60         | M      | 0              | Urine         | -                                               | -                                   |
| 61         | F      | 2              | Serum         | -                                               | -                                   |
| 62         | F      | 7              | Urine         | -                                               | -                                   |
| 63         | F      | 0              | Serum         | -                                               | -                                   |
| 63         | F      | 0              | Urine         | -                                               | -                                   |
| 64         | F      | 7              | Urine         | 28.03                                           | 28.68                               |
| 65         | F      | 2              | Serum         | 37.79                                           | 38.15                               |
| 65         | F      | 2              | Urine         | 36.07                                           | 37.66                               |
| 66         | F      | 2              | Serum         | 33.06                                           | 33.21                               |
| 67         | F      | 4              | Serum         | 30.66                                           | 30.19                               |
| 68         | M      | 1              | Serum         | -                                               | -                                   |
| 69         | M      | 2              | Serum         | 35.08                                           | 35.14                               |
| 70         | F      | 3              | Urine         | -/37.83/37.92                                   | 39.17/38.05                         |
| 71         | F      | 1              | Serum         | -                                               | -                                   |
| 72         | M      | 1              | Serum         | 36.58/38.12                                     | -/37.7/37.43                        |
| 73         | F      | 3              | Urine         | 33.36                                           | 32.98                               |
| 74         | F      | 4              | Serum         | -                                               | -                                   |
| 74         | F      | 4              | Urine         | -                                               | -                                   |
| 75         | F      | 3              | Serum         | 35.03                                           | 35.3                                |
| 76         | M      | 3              | Serum         | 34.06                                           | 34.01                               |
| 77         | F      | 3              | Urine         | 35.02                                           | 34.66                               |
| 78         | F      | 6              | Serum         | 32                                              | 32.03                               |
| 78         | F      | 6              | Urine         | 33.55                                           | 35.52                               |
| 79         | F      | 2              | Serum         | 34.99                                           | 36.29                               |
| 79         | F      | 2              | Urine         | 26.59                                           | 26.94                               |
| 80         | M      | 3              | Serum         | 31.93                                           | 31.17                               |
| 80         | M      | 3              | Urine         | 37.78/-                                         | -/-                                 |
| 81         | F      | 4              | Serum         | 35.07                                           | 35.32                               |
| 81         | F      | 4              | Urine         | 34.51                                           | 36.42                               |
| 82         | F      | 1              | Serum         | 33.51                                           | 33.09                               |
| 83         | F      | 0              | Serum         | 26.83                                           | 26.55                               |
| 83         | F      | 8              | Urine         | 19.37                                           | 17.88                               |
| 84         | F      | 3              | Urine         | 34.83                                           | 35.38                               |
| 85         | M      | 5              | Urine         | 33.31                                           | 33.31                               |
| 86         | M      | 6              | Urine         | -                                               | -                                   |
| 87         | M      | 3              | Serum         | 35.07                                           | 34.18                               |
| 87         | M      | 3              | Urine         | 31.01                                           | 30.48                               |
| 88         | F      | 6              | Serum         | -                                               | -                                   |
| 88         | F      | 6              | Urine         | 28.58                                           | 28.01                               |
| 89         | F      | 3              | Serum         | 30.87                                           | 29.98                               |
| 90         | F      | 2              | Serum         | 28.58                                           | 27.77                               |
| 91         | F      | 1              | Serum         | 33.71                                           | 33.66                               |
| 92         | F      | 3              | Urine         | 35.6                                            | 38.29                               |
| 93         | M      | 3              | Serum         | 36.78                                           | 37.92                               |
| 94         | M      | 6              | Urine         | -/37.79/-                                       | 38.81/38.96                         |
| 95         | F      | 3              | Serum         | 37.6                                            | 37.61                               |

(continued)

SUPPLEMENTAL TABLE 1

Continued

| Patient ID | Gender | Delay of onset | Specimen type | RealStar Zika Virus RT-PCR (C <sub>t</sub> FAM) | Lancotti E PCR (C <sub>t</sub> FAM) |
|------------|--------|----------------|---------------|-------------------------------------------------|-------------------------------------|
| 96         | F      | 5              | Urine         | 33.77                                           | 34.09                               |
| 97         | M      | 3              | Serum         | 28.47                                           | 27.18                               |
| 98         | F      | 2              | Serum         | 32.09                                           | 31.38                               |
| 98         | F      | 2              | Urine         | 37.64                                           | 38.33                               |
| 99         | F      | 1              | Urine         | 33.47                                           | 35.44                               |
| 100        | F      | 4              | Urine         | -                                               | -                                   |
| 101        | M      | 7              | Urine         | -                                               | -                                   |
| 102        | F      | 0              | Serum         | -                                               | -                                   |
| 103        | F      | 3              | Urine         | 33.63                                           | 33.45                               |
| 104        | F      | 2              | Serum         | 36.05                                           | 36.08                               |
| 104        | F      | 2              | Urine         | 37.63                                           | 38.13                               |
| 105        | F      | 0              | Serum         | 33.25                                           | 33.38                               |
| 106        | F      | 1              | Urine         | 34.63                                           | 35.41                               |
| 107        | F      | 2              | Serum         | 37.96                                           | 39.51                               |
| 108        | F      | 5              | Serum         | 33.81                                           | 33.68                               |
| 108        | F      | 5              | Urine         | 35.89                                           | 36.57                               |
| 109        | F      | 1              | Serum         | -                                               | -                                   |
| 110        | M      | 7              | Urine         | -                                               | -                                   |
| 111        | F      | 1              | Serum         | 37.07                                           | 38.54                               |
| 112        | F      | 2              | Urine         | 35.76/36.38                                     | -/-/37.71                           |
| 113        | F      | 2              | Serum         | 31.13                                           | 30.62                               |
| 114        | M      | 1              | Urine         | -                                               | -                                   |
| 115        | F      | 5              | Serum         | -/36.14/37.82                                   | 36.89/36.61                         |
| 115        | F      | 5              | Urine         | 31.12                                           | 30.34                               |
| 116        | F      | 2              | Serum         | 35.75                                           | 37.02                               |
| 117*       | F      | 3              | Urine         | 37.9/37.13                                      | -/-/-                               |
| 118        | F      | 1              | Serum         | 35.27                                           | 35.16                               |
| 119        | F      | 3              | Serum         | 35.41                                           | 36.2                                |
| 120        | F      | 3              | Urine         | 36.5/36.47                                      | -/38.56/38.75                       |
| 121        | M      | 6              | Urine         | 28.27                                           | 28.31                               |
| 122        | M      | 3              | Serum         | 30.27                                           | 29.05                               |
| 123        | M      | 1              | Serum         | 25.15                                           | 24.59                               |
| 124        | F      | 3              | Urine         | 34.03                                           | 35.76                               |
| 125        | F      | 5              | Urine         | 27.22                                           | 27.75                               |
| 126        | F      | 3              | Urine         | 34.14                                           | 35.86                               |
| 126        | F      | 1              | Urine         | 37.81/-                                         | -/-/-                               |
| 127        | F      | 2              | Serum         | 27.47                                           | 27.38                               |
| 127        | F      | 6              | Serum         | 37.28                                           | 37.99                               |
| 127        | F      | 6              | Urine         | 26.93                                           | 25.9                                |
| 128        | M      | 2              | Serum         | 29.58                                           | 28.76                               |
| 129        | F      | 3              | Serum         | 34.26                                           | 33.89                               |
| 129        | F      | 3              | Urine         | 37.72/-                                         | -/38.72/-                           |
| 130        | M      | 3              | Urine         | 35.43                                           | 35.13                               |
| 131        | F      | 0              | Serum         | -                                               | -                                   |
| 131        | F      | 0              | Urine         | 36.28                                           | 36.82                               |
| 132        | F      | 3              | Serum         | 30.58                                           | 30.1                                |
| 133        | F      | 4              | Serum         | 35.2                                            | 35.45                               |
| 134        | F      | 0              | Urine         | -                                               | -                                   |
| 135        | M      | 4              | Plasma        | 32.37                                           | 32.22                               |
| 135        | M      | 4              | Serum         | 34.19                                           | 34.39                               |
| 135        | M      | 4              | Urine         | 33.21                                           | 34.16                               |
| 136        | F      | 0              | Serum         | 36.58                                           | 37.04                               |
| 137        | F      | 3              | Urine         | 32.11                                           | 31.41                               |
| 138        | F      | 2              | Serum         | 34.84                                           | 34.56                               |
| 139        | M      | 3              | Urine         | 33.61                                           | 33.88                               |
| 140        | M      | 2              | Serum         | 31.01                                           | 30.39                               |
| 140        | M      | 2              | Urine         | 33.44                                           | 33.48                               |
| 141        | F      | 4              | Urine         | 31.12                                           | 30.32                               |
| 142        | F      | 3              | Serum         | 33.65                                           | 33.5                                |
| 143        | F      | 0              | Serum         | 29.11                                           | 28.39                               |
| 143        | F      | 0              | Urine         | 35.88                                           | 37.81                               |
| 144        | F      | 0              | Serum         | 31.06                                           | 30.12                               |
| 145        | F      | 4              | Serum         | 33.29                                           | 33.17                               |
| 146        | F      | 4              | Urine         | 26.17                                           | 26                                  |
| 147        | M      | 1              | Urine         | -                                               | -                                   |
| 148        | M      | 5              | Urine         | 31.22                                           | 30.27                               |
| 149        | F      | 2              | Serum         | 30.07                                           | 29.81                               |
| 150        | F      | 0              | Serum         | 35.36                                           | 35.23                               |

(continued)

SUPPLEMENTAL TABLE 1  
Continued

| Patient ID | Gender | Delay of onset | Specimen type | RealStar Zika Virus RT-PCR (C <sub>t</sub> FAM) | Lancotti E PCR (C <sub>t</sub> FAM) |
|------------|--------|----------------|---------------|-------------------------------------------------|-------------------------------------|
| 151        | F      | 2              | Serum         | 28.97                                           | 28.29                               |
| 152*       | F      | 5              | Serum         | 37.16/-                                         | -/-                                 |
| 152        | F      | 5              | Urine         | -                                               | -                                   |
| 153        | F      | 2              | Serum         | -                                               | -                                   |

C<sub>t</sub> = cycle threshold; RT-PCR = reverse transcription polymerase chain reaction.

\*Positive results for patients 117 and 152 have only been generated with the RealStar Zika Virus and therefore are counted as false positives.
